# Supplementary material for: Green tea polyphenol treatment attenuates atherosclerosis in high-fat diet-fed apolipoprotein E-knockout mice via alleviating dyslipidemia and up-regulating autophagy
Source: PLoS One. 2017 Aug 4;12(8):e0181666. doi: 10.1371/journal.pone.0181666 (PMC5544182; doi:10.1371/journal.pone.0181666)
Supplement: S11 Table — (DOC) [file pone.0181666.s011.doc]

**S11 Table.** **Atherosclerotic lesion analysis**

|  | C57BL/6J/Control group | ApoE-/-/Control group | ApoE-/-/GTP-L group | ApoE-/-/ GTP-H group |
| --- | --- | --- | --- | --- |
| Mean | 6.42 | 33.58 | 22.62 | 20.72 |
| SD | 1.10 | 2.73 | 2.87 | 2.44 |
